# Supplementary material
Source: publisher figshare collection journal article supplement (https://sage.figshare.com/ndownloader/files/13198622)
Supplement: Supplementary file 1 [file 13198622]

Online Appendix.

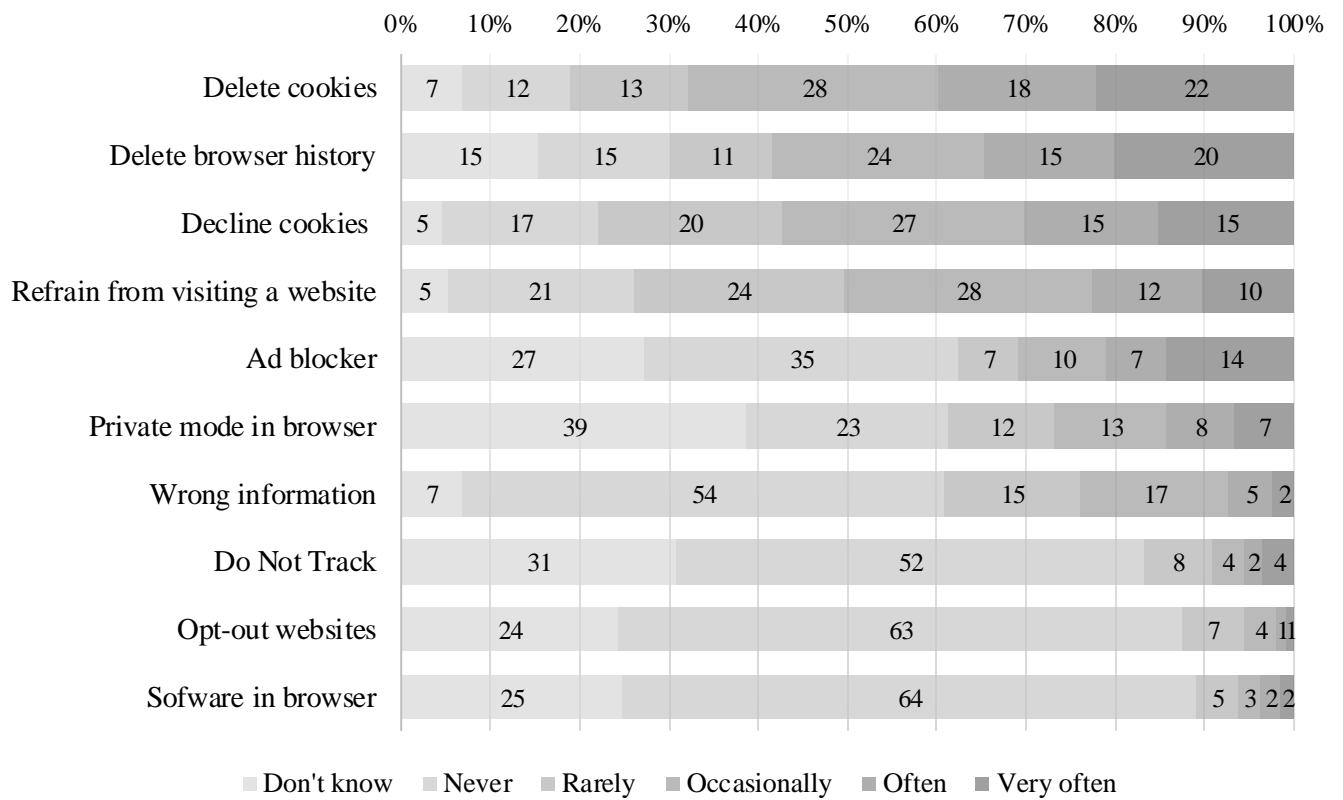

Figure 1. Descriptive Statistics of Online Privacy Protective Behavior (Wave 1, N = 928).

Numbers in bars are percentages. Protective behaviors are ordered from most often used to least often used.
